# Supplementary material for: Nitrogen-doped carbon dots as visible light initiators for 3D (bio)printing
Source: Royal Society of Chemistry journal article supplement (doi:10.1039/d2py01324j), 2022-12-02
Supplement: d2py01324j1.pdf [file d2py01324j1.pdf]

## Supporting Information

### Nitrogen-doped carbon dots as visible light initiators for 3D (bio)printing

*Xing Huang<sup>a</sup>, Mengquan Shi<sup>a,\*</sup>, Haoqi Zhai<sup>a,b</sup>, Yuxi Zhang<sup>a</sup>, Yunlong Zhang<sup>a</sup> and Yuxia Zhao<sup>a,b,\*</sup>*

<sup>a</sup> Key Laboratory of Photochemical Conversion and Optoelectronic Materials, Technical Institute of Physics and Chemistry, Chinese Academy of Sciences, 29 Zhongguancun East Road, Haidian District, Beijing, 100190, China. Email: [shimengquan@mail.ipc.ac.cn](mailto:shimengquan@mail.ipc.ac.cn); [yuxia.zhao@mail.ipc.ac.cn](mailto:yuxia.zhao@mail.ipc.ac.cn);

<sup>b</sup> University of Chinese Academy of Sciences, No.19A Yuquan Road, Beijing, 100049, China.

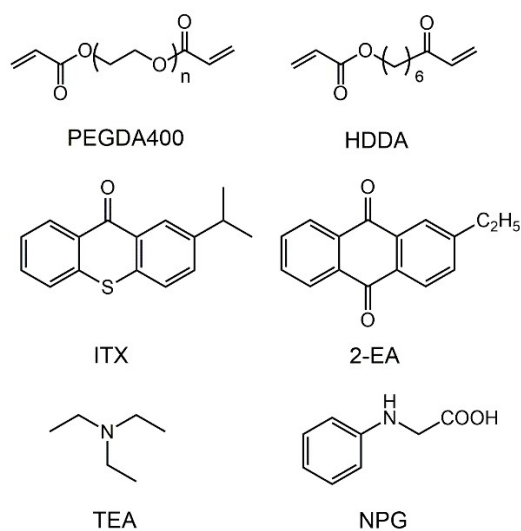

**Scheme S1** Chemical structures of compounds used in this study.

**Table S1** Composition of raw materials for synthesizing the CDs.

| Sample | Urea<br>(g) | Sodium citrate<br>(g) | Citric acid<br>(g) |
|--------|-------------|-----------------------|--------------------|
| CD-1   | 0.202       | 0.110                 | 0                  |
| CD-2   | 0.202       | 0.037                 | 0.048              |

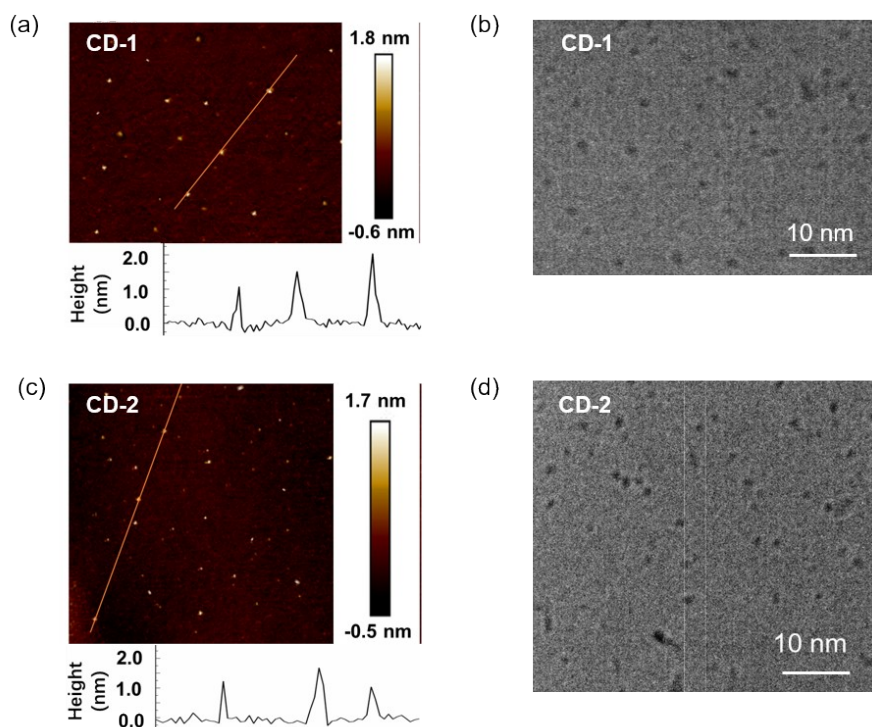

**Fig. S1** AFM (a, c) and TEM (b, d) images of CD-1 and CD-2.

**Table S2** Atomic ratio of different elements in the samples.

| Sample | C (%) | N (%) | O (%) | Na (%) |
|--------|-------|-------|-------|--------|
| CD-1   | 54    | 17    | 24    | 5      |
| CD-2   | 39    | 36    | 23    | 2      |

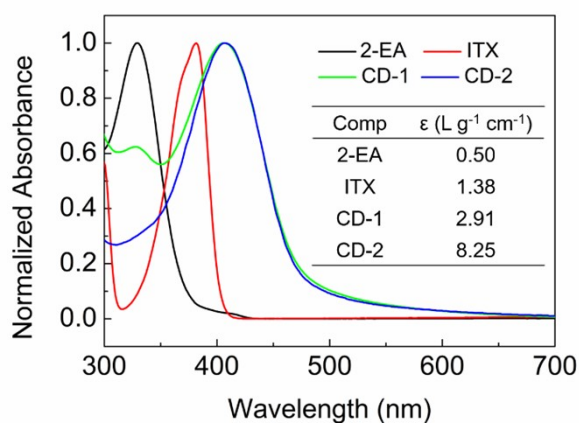

**Fig. S2** Normalized UV-vis absorption spectra of different compounds in diluted solutions. The inset shows their extinction coefficient at 405 nm.

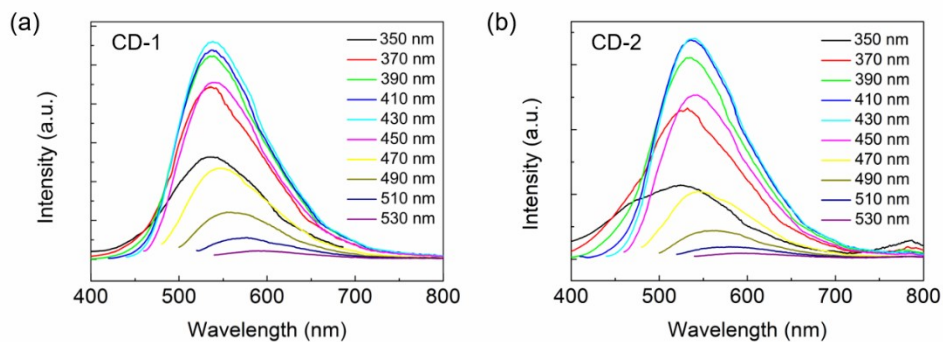

**Fig. S3** Fluorescence emission spectra of CD-1 (a) and CD-2 (b) in diluted water solutions under excitation of light with different wavelengths.

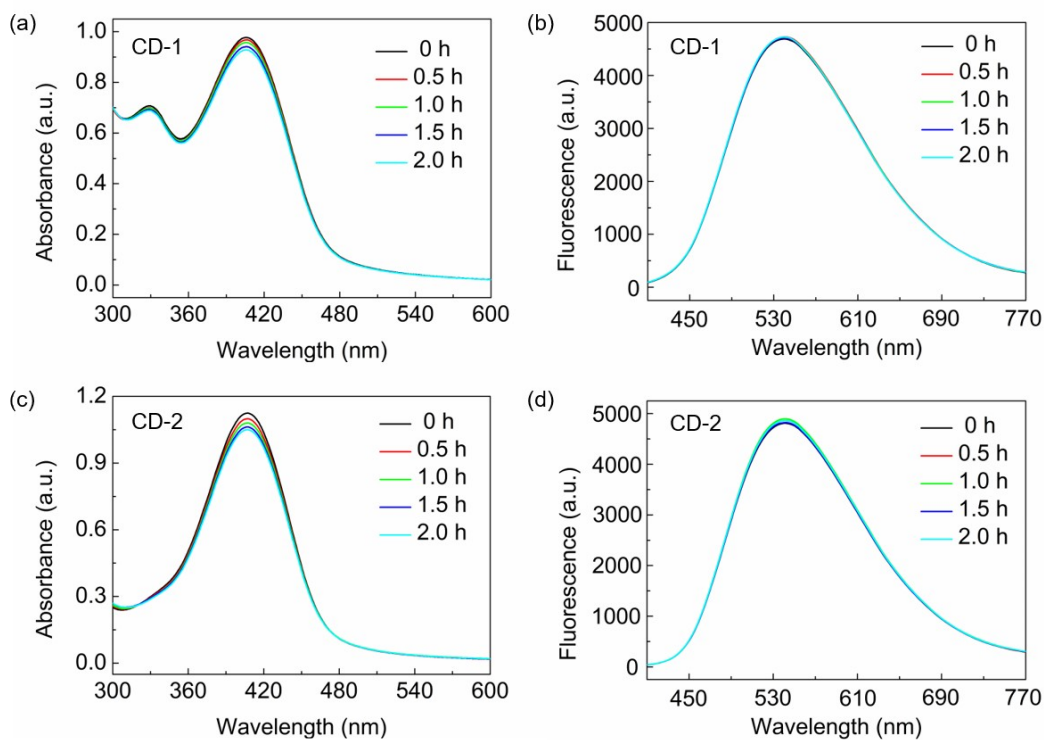

**Fig. S4** UV-vis absorption spectra (a, c) and fluorescence emission spectra (b, d) of CDs in aqueous solutions after the irradiation of a 405 nm LED ( $100 \text{ mW/cm}^2$ ) for different times.

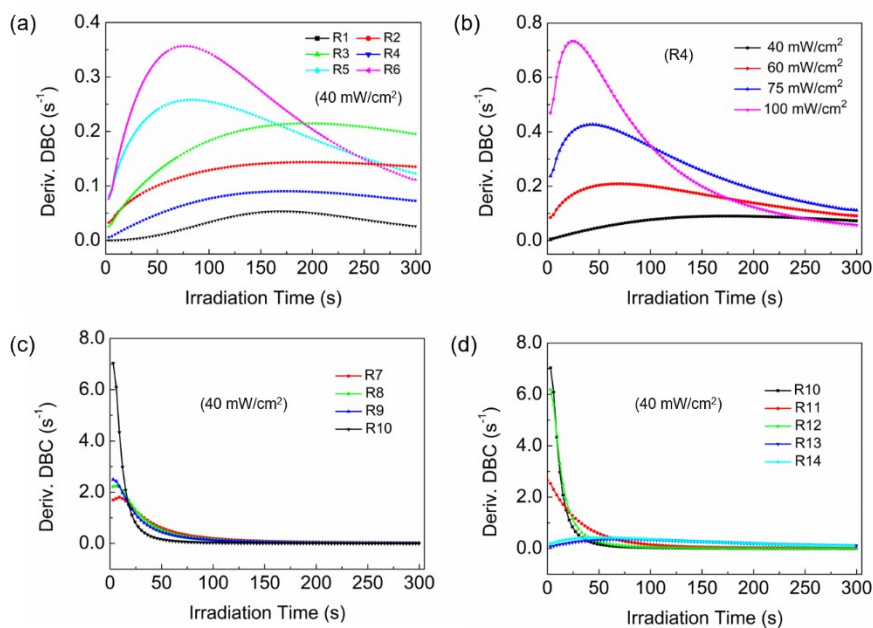

**Fig. S5** Derived curves of DBC versus irradiation time of **R1–R14** under the irradiation of a 405 nm LED with the same light intensity of 40 mW/cm<sup>2</sup> (a, c and d) and **R4** with different light intensities (b).

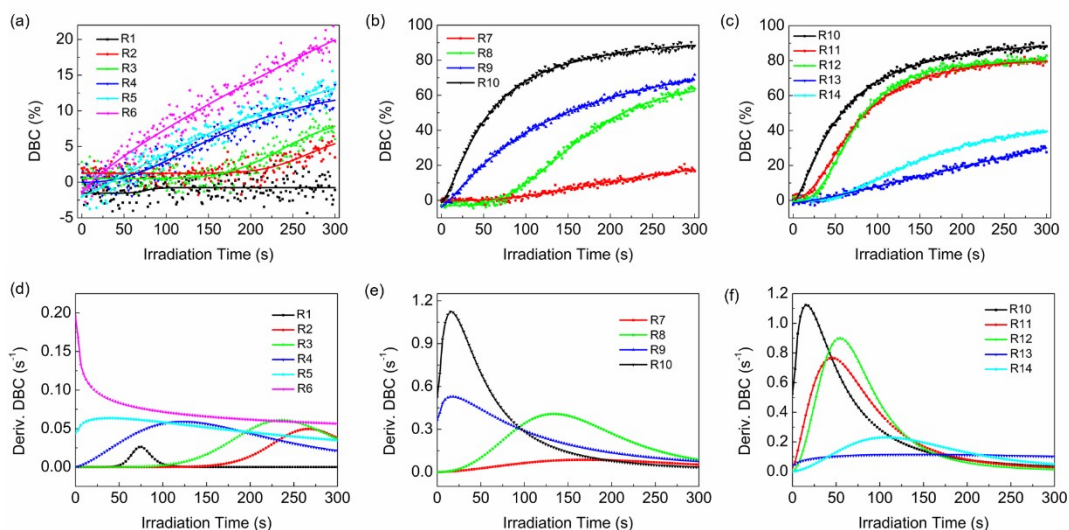

**Fig. S6** Photopolymerization kinetics curves of **R1–R14** under irradiation of a 450 nm LED (40 mW/cm<sup>2</sup>).

**Table S3** The formulations of resins **R1–R14** and their photopolymerization kinetics data under irradiation of a 450 nm LED.

| Resin | CD-1<br>(mg) | CD-2<br>(mg) | H <sub>2</sub> O<br>(mg) | PEGDA<br>(mg) | TEA<br>(mg) | NPG<br>(mg) | ITX<br>(mg) | 2-EA<br>(mg) | DMSO<br>(mg) | DBC<br>(%) | R <sub>max</sub><br>(10 <sup>-2</sup> s <sup>-1</sup> ) |
|-------|--------------|--------------|--------------------------|---------------|-------------|-------------|-------------|--------------|--------------|------------|---------------------------------------------------------|
| R1    | 1.0          | 0            | 100                      | 1000          | 0           | 0           | 0           | 0            | 0            | -          | -                                                       |
| R2    | 2.0          | 0            | 100                      | 1000          | 0           | 0           | 0           | 0            | 0            | 5.4        | 4.9                                                     |
| R3    | 3.0          | 0            | 100                      | 1000          | 0           | 0           | 0           | 0            | 0            | 7.8        | 6.1                                                     |
| R4    | 0            | 1.0          | 100                      | 1000          | 0           | 0           | 0           | 0            | 0            | 11.5       | 5.9                                                     |
| R5    | 0            | 2.0          | 100                      | 1000          | 0           | 0           | 0           | 0            | 0            | 13.2       | 6.8                                                     |
| R6    | 0            | 3.0          | 100                      | 1000          | 0           | 0           | 0           | 0            | 0            | 19.9       | 19.5                                                    |
| R7    | 1.0          | 0            | 100                      | 1000          | 1.0         | 0           | 0           | 0            | 0            | 17.4       | 8.6                                                     |
| R8    | 1.0          | 0            | 100                      | 1000          | 0           | 1.0         | 0           | 0            | 0            | 62.4       | 40.7                                                    |
| R9    | 0            | 1.0          | 100                      | 1000          | 1.0         | 0           | 0           | 0            | 0            | 68.8       | 52.9                                                    |
| R10   | 0            | 1.0          | 100                      | 1000          | 0           | 1.0         | 0           | 0            | 0            | 88.4       | 112.3                                                   |
| R11   | 0            | 0            | 0                        | 1000          | 1.0         | 0           | 1.0         | 0            | 100          | 79.9       | 76.7                                                    |
| R12   | 0            | 0            | 0                        | 1000          | 0           | 1.0         | 1.0         | 0            | 100          | 80.3       | 89.5                                                    |
| R13   | 0            | 0            | 0                        | 1000          | 1.0         | 0           | 0           | 1.0          | 100          | 30.0       | 11.4                                                    |
| R14   | 0            | 0            | 0                        | 1000          | 0           | 1.0         | 0           | 1.0          | 100          | 39.5       | 23.0                                                    |

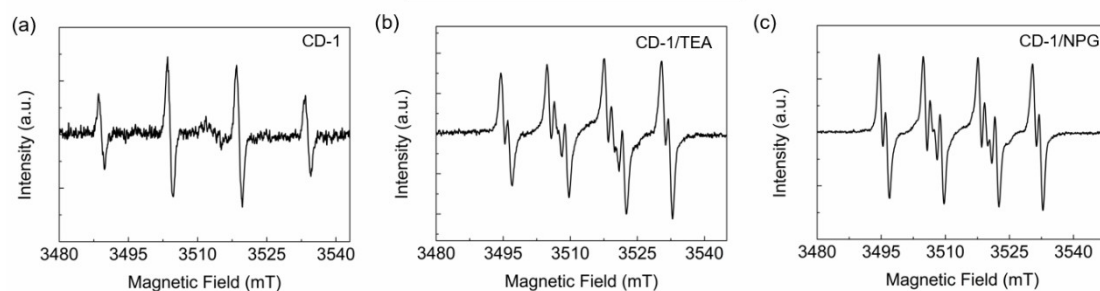

**Fig. S7** ESR spectra of (a) CD-1 (1.0 g/L), (b) CD-1/TEA and (c) CD-1/NPG, (1.0/1.0 g/L) in nitrogen-saturated water, the light source is a 405 nm LED (40 mW/cm<sup>2</sup>).

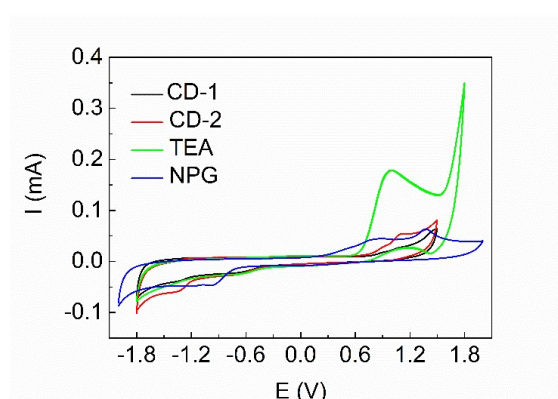

**Fig. S8** Cyclic voltammogram curves of CDs and co-initiators in aqueous solution (1.0 g/L).

**Table S4** Oxidation and reduction potentials of reactants extracted from the cyclic voltammetry curves.

| Compound | $E_{\text{ox}}$ (V) | $E_{\text{red}}$ (V) | $E_s$ |
|----------|---------------------|----------------------|-------|
| CD-1     | -                   | -0.70                | 2.66  |
| CD-2     | -                   | -0.72                | 2.66  |
| TEA      | 0.99                | -                    |       |
| NPG      | 0.89                | -                    |       |

$E_s$  was the energy difference between the absorption peak and emission peak of the reactants from their UV-vis absorption and fluorescence emission spectra, respectively.

**Table S5** Free energy change ( $\Delta G_s$ ) of the four combinations calculated by Rehm-Weller equation.

| Photo redox couples | CD-1*/TEA | CD-1*/NPG | CD-2*/TEA | CD-2*/NPG |
|---------------------|-----------|-----------|-----------|-----------|
| $\Delta G_s$ (eV)   | -0.97     | -1.07     | -0.95     | -1.05     |

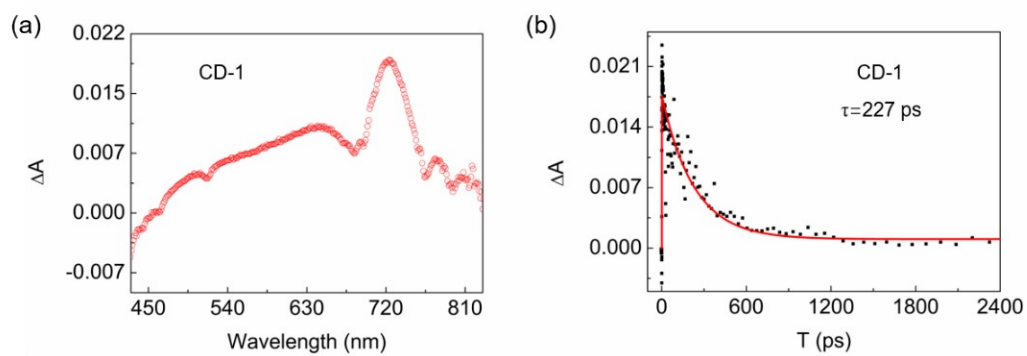

**Fig. S9** (a) Transient absorption spectrum of CD-1 in water (1.0 g/L). (b) Exponential fitting curve of time profiles of the absorbance of CD-1 at 720 nm.



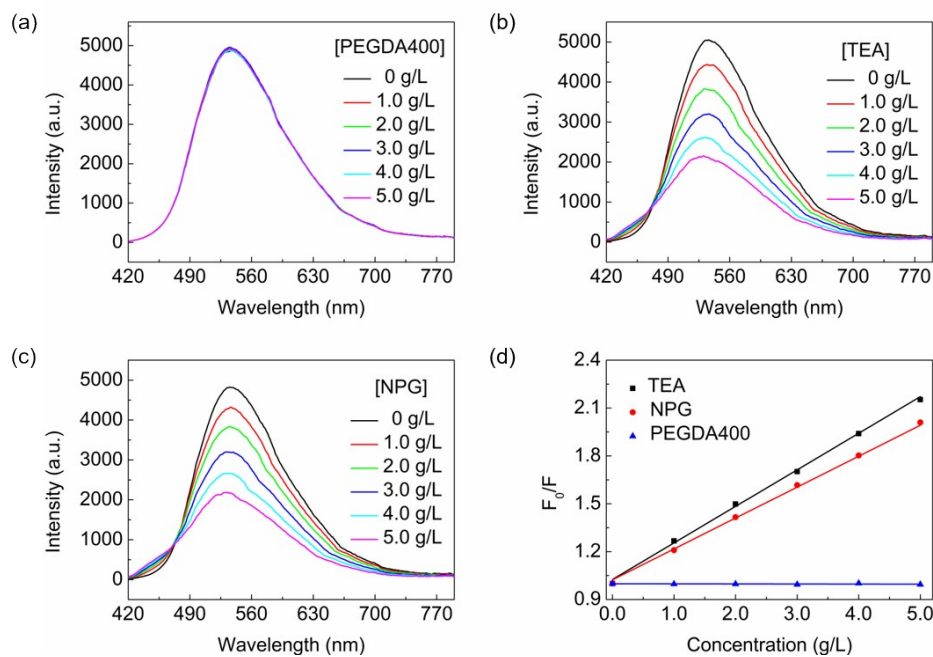

**Fig. S10** Fluorescence quenching of CD-1 by different amount of PEGDA400 (a), TEA (b), and NPG (c) in the diluted solutions. (d) Stern–Volmer plots.

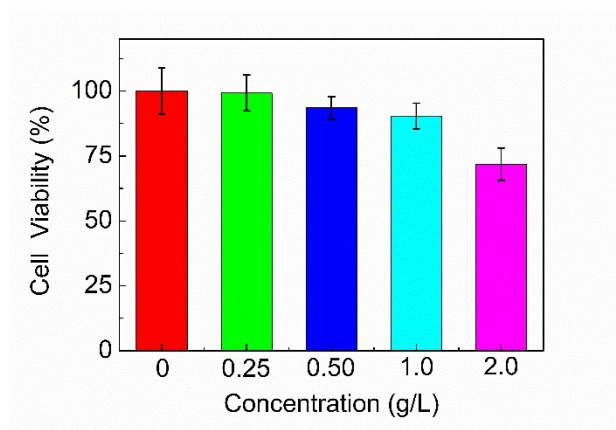

**Fig. S11** Relative cell viability of L929 cells after 24 h incubation in NPG solutions.
